# Supplementary material for: Mitogen-Activated Protein Kinase Cross-Talk Interaction Modulates the Production of Melanins in Aspergillus fumigatus
Source: mBio. 2019 Mar 26;10(2):e00215-19. doi: 10.1128/mBio.00215-19 (PMC6437049; doi:10.1128/mBio.00215-19)
Supplement: FIG S5 [file mBio.00215-19-sf005.pdf]

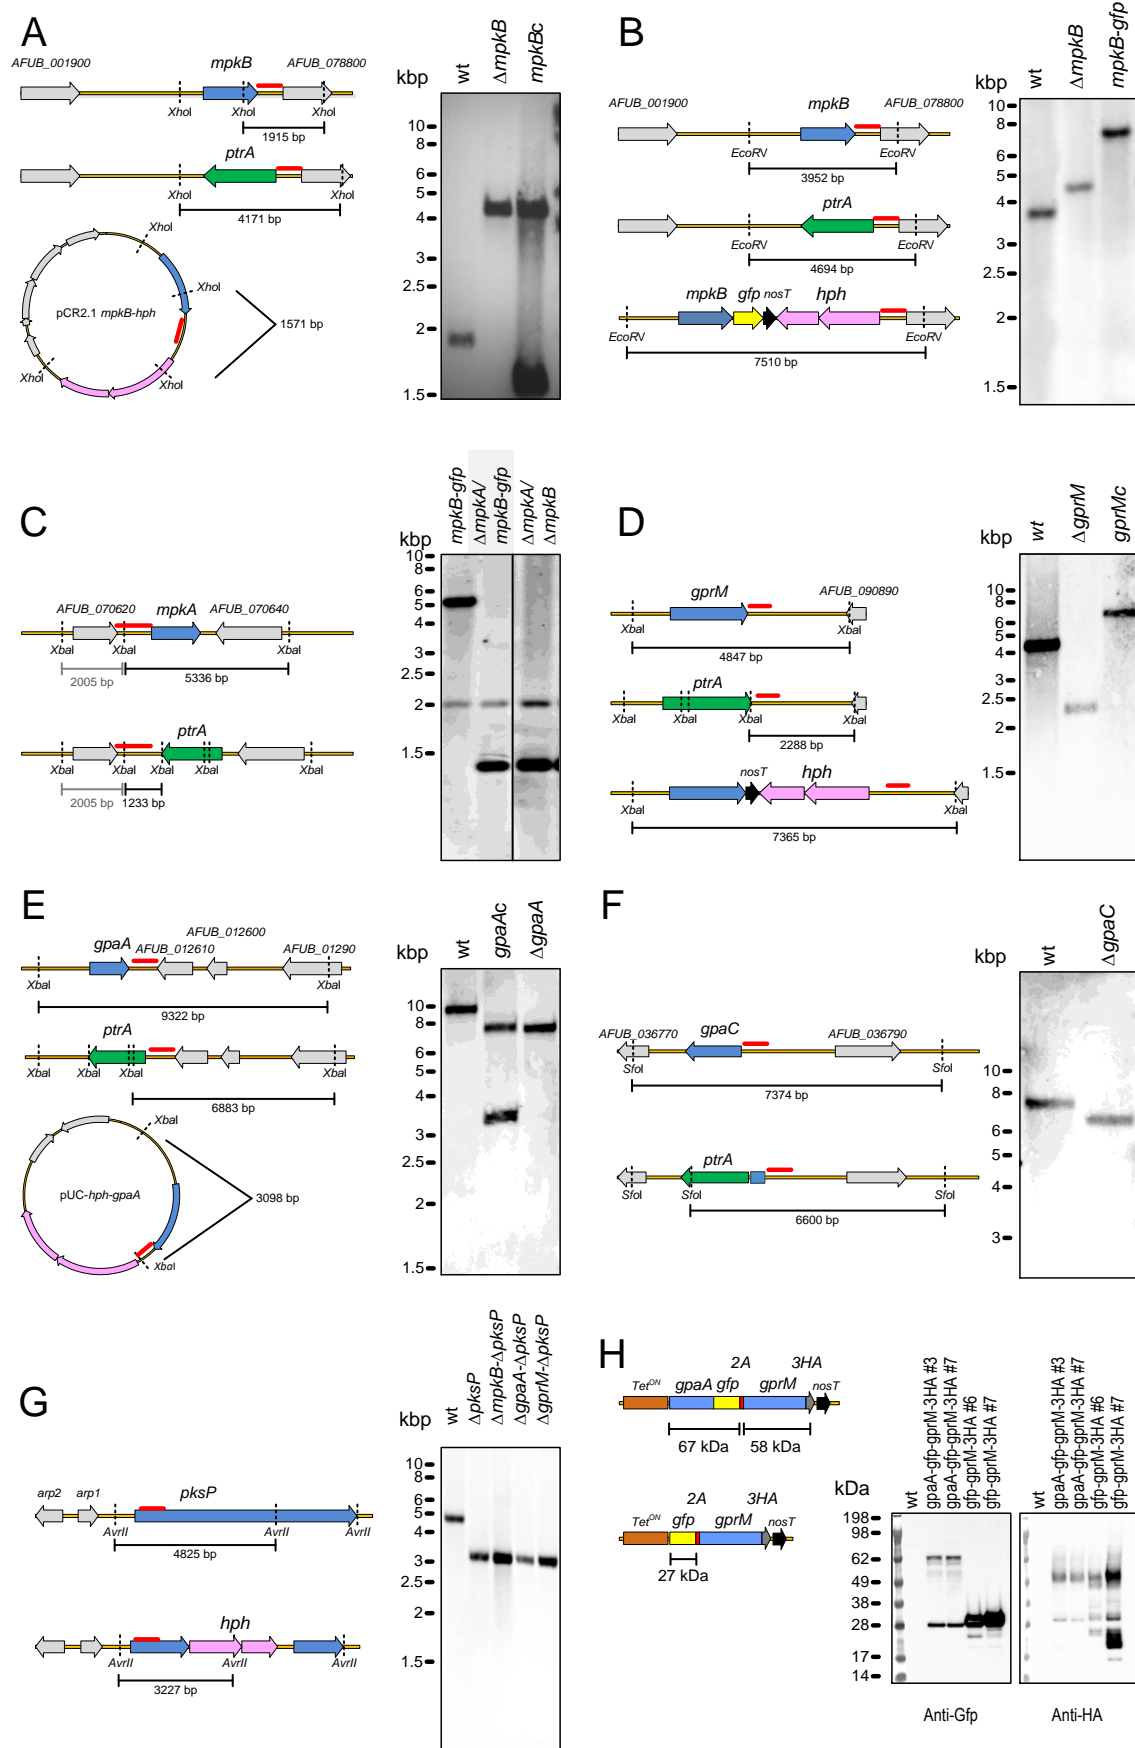

**Figure S5.** Graphical representation of the mutated loci for the analyzed *A. fumigatus* mutants and their respective Southern blots. The genes of interest are shown in blue, their flanking genes are in gray. The cassettes for resistance to pyrithiamine (*ptrA*) and hygromycin (*hph*) are labeled in green and pink, respectively. The probes used for Southern blot analyses are marked as red stripes. The DNA ladder used is indicated (Hyperladder 1Kb, Bioline). (A) The *mpkB* gene was deleted, and the mutant strain complemented with the native gene by ectopic integration. (B) The  $\Delta mpkB$  strain was complemented by homologous recombination with the native *mpkB* gene fused with a *gfp* sequence (in yellow), and a *nos* terminator sequence (in black). (C) Deletion of the *mpkA* gene in the *mpkB-gfp* background and in the  $\Delta mpkB$  strain. The Southern blots were performed separately. The probe also anneals an additional ~2 Kb band. (D) Deletion and complementation of the *gprM* locus; the complementation was obtained by homologous recombination. (E) Deletion and complementation of the *gpaA* locus. The complementation was performed by ectopic integration of the *gpaA* wild-type gene. (F) Disruption of the *gpaC* gene. (G) Disruption of the *pksP* gene in the wild-type, the  $\Delta mpkB$ , the  $\Delta gpaA$  and the  $\Delta gprM$  strains. (H) The dicistronic genes including the *gpaA-gfp/gprM-3HA* and the *gfp/gprM-3HA* sequences were ectopically integrated in the *A. fumigatus* CEA10 strain. Positive transformants have been validated by western-blot using anti-GFP antibodies (left panel) and anti-HA antibodies (right panel). The predicted molecular weights of the gene products are also reported.
