# Supplementary material for: Mitogen-Activated Protein Kinase Cross-Talk Interaction Modulates the Production of Melanins in Aspergillus fumigatus
Source: PubMed Central journal article supplement (PMC6437049; doi:10.1128/mbio.00215-19), 2019-03-26
Supplement: mBio.00215-19-sf002.pdf [file mBio.00215-19-sf002.pdf]

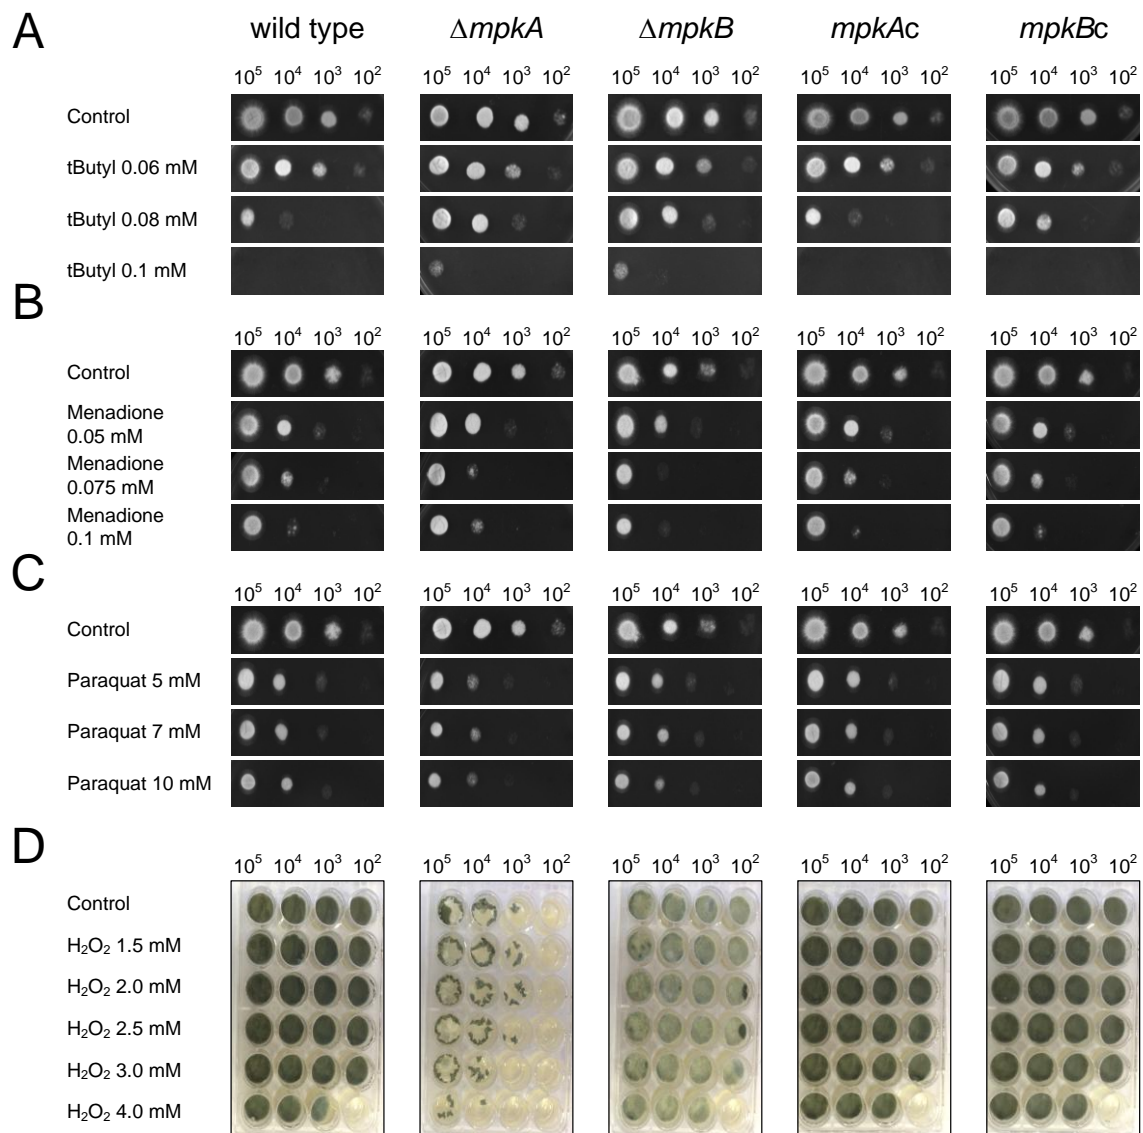

**Figure S2.** Growth phenotypes of the wild-type,  $\Delta mpkA$ ,  $\Delta mpkB$  and corresponding complementing mutants grown in MM in presence of (A) *t*-Butyl, (B) menadione, (C) paraquat, and (D) hydrogen peroxide. The strains were grown for 48 hours at 37 °C either on solid AMM media (A-C) or on AMM liquid media in 96-wells plates (D). Numbers of inoculated conidia are also reported.
