# Supplementary material for: Mitogen-Activated Protein Kinase Cross-Talk Interaction Modulates the Production of Melanins in Aspergillus fumigatus
Source: PubMed Central journal article supplement (PMC6437049; doi:10.1128/mbio.00215-19), 2019-03-26
Supplement: mBio.00215-19-sf003.pdf [file mBio.00215-19-sf003.pdf]

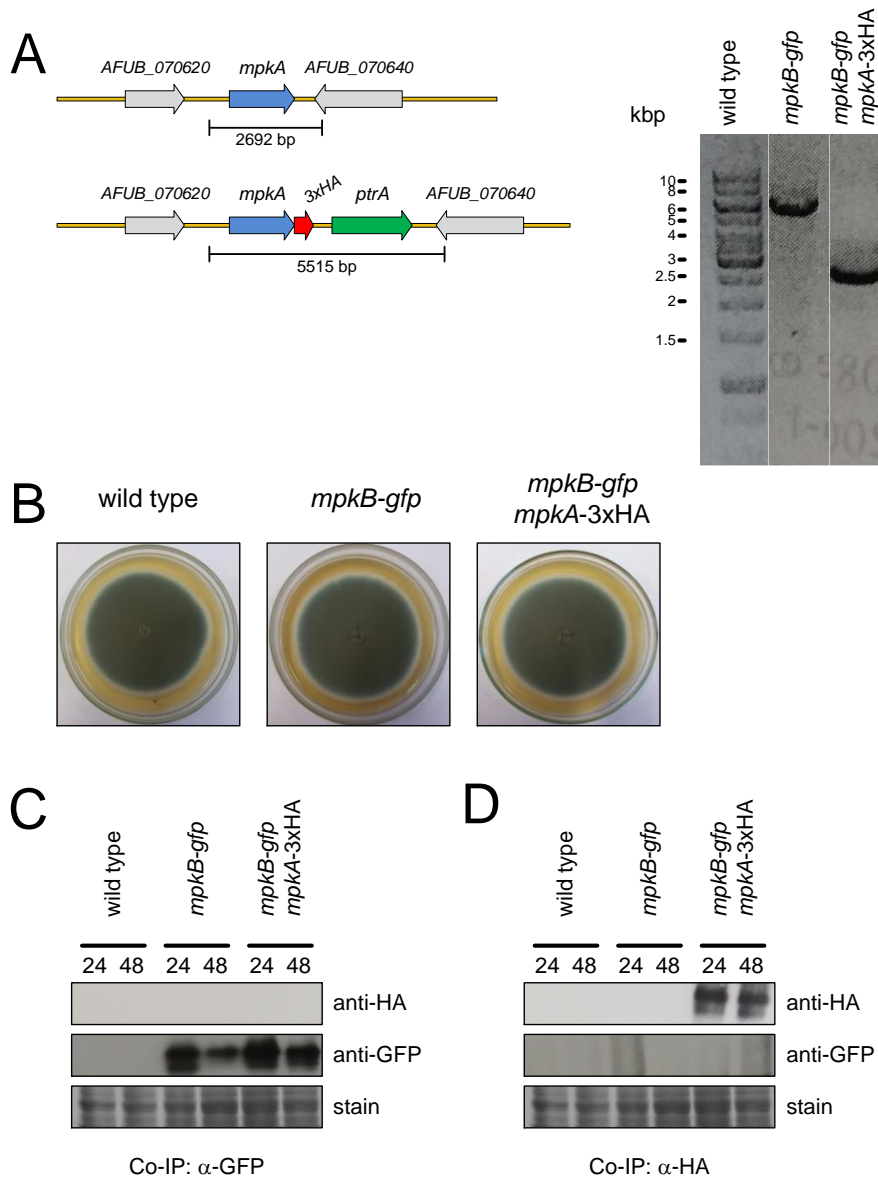

**Figure S3. Co-immunoprecipitation assay performed with tagged MpkA and MpkB.** (A) Diagnostic PCR to validate the in locus homologous insertion of the *mpkA-3xHA* construct in the *mpkB-gfp* strain. (B) Phenotype analysis of wild type, *mpkB-gfp* and *mpkB-gfp/mpkA-3xHA* strains grown on MM agar plates for 4 days at 37 °C. (C-D) Affinity purification assays for the 3xHA-tagged MpkA and the GFP-tagged MpkB were performed with GFP-Trap beads (C) and anti-HA beads (D) to verify interactions. The co-immunoprecipitated proteins were analyzed by the indicated antibodies. The used co-immunoprecipitation protocol is reported in the supplementary text.
