# Supplementary material for: Mitogen-Activated Protein Kinase Cross-Talk Interaction Modulates the Production of Melanins in Aspergillus fumigatus
Source: PubMed Central journal article supplement (PMC6437049; doi:10.1128/mbio.00215-19), 2019-03-26
Supplement: mBio.00215-19-sf004.pdf [file mBio.00215-19-sf004.pdf]

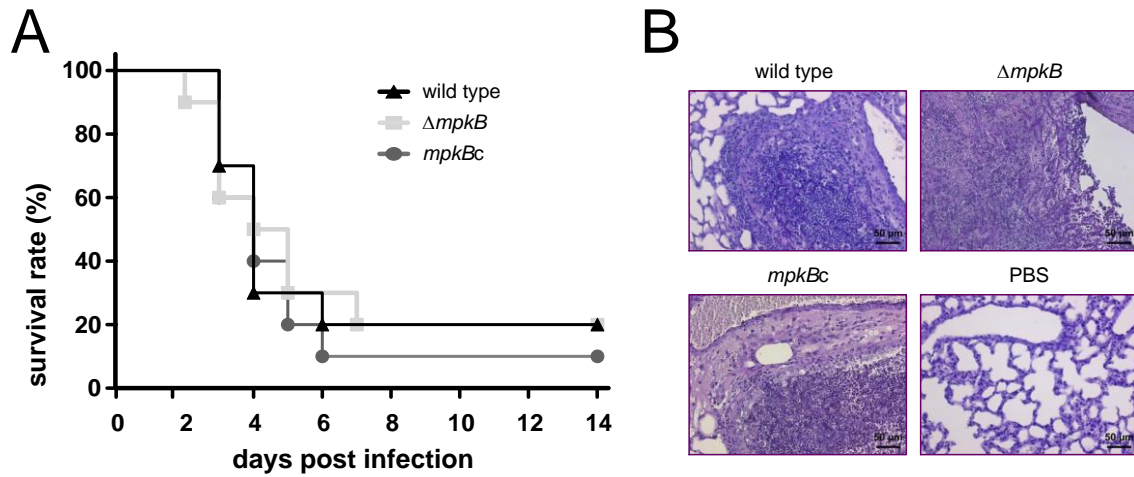

**Figure S4.** (A) Survival rate of mice infected with conidia from wild-type,  $\Delta mpkB$  and  $mpkBc$  strains. Mice in groups of 10 per strain were infected intranasally with a 20  $\mu l$  suspension of conidia at a dose of  $2 \times 10^5$ . (B) Histopathology of lung tissue from mice infected with the wild-type,  $\Delta mpkB$ , and the  $mpkBc$  strains plus the PBS-control using PAS staining. All the infected mice displayed a normal fungal persistence when compared to the uninfected ones.
