# Supplementary material for: Mitogen-Activated Protein Kinase Cross-Talk Interaction Modulates the Production of Melanins in Aspergillus fumigatus
Source: PubMed Central journal article supplement (PMC6437049; doi:10.1128/mbio.00215-19), 2019-03-26
Supplement: mBio.00215-19-st001.pdf [file mBio.00215-19-st001.pdf]

Supplementary Table S1. Primers used in this study.

| N° | Name                          | Sequence 5'-3'                                            | Usage                              |
|----|-------------------------------|-----------------------------------------------------------|------------------------------------|
| 1  | mpkB_for                      | CACGATACTATTTCGACCTTC                                     | <i>mpkB</i> deletion plasmid       |
| 2  | mpkB_rev                      | GACAGGAGTATTTGGCTCTGG                                     | <i>mpkB</i> deletion plasmid       |
| 3  | mpkB_Del_for                  | GGGAGATTTCAGTGGCGTCTCTTG                                  | <i>mpkB</i> deletion plasmid       |
| 4  | mpkB_Del_rev                  | GGGTTGCTAACTTTCAGCATC                                     | <i>mpkB</i> deletion plasmid       |
| 5  | mpkB_pYes_P11                 | GCTGTAATACGACTCACTATAGGGAATATTGT<br>TACTAGTGGATCCCCGGG    | <i>mpkB-gfp</i> plasmid            |
| 6  | mpkB_pYes_P2                  | CGATCCTCCTTGAGGAGTTGCTGCACCATGG<br>TTGCTAACTTTCAGCATC     | <i>mpkB-gfp</i> plasmid            |
| 7  | mpkB_pYes_P3                  | ATAGTGCCACGTTCTAAATTCAACCAAGGGCG<br>AATTCTGCAGATGGGAG     | <i>mpkB-gfp</i> plasmid            |
| 8  | mpkB_pYes_P4                  | CATAACTAATTACATGATGCGGCCCTCTAGGA<br>CAGGAGTATTTGGCTCTGG   | <i>mpkB-gfp</i> plasmid            |
| 9  | eGFP_for_vv                   | ATGGTGAGCAAGGGCGAGGAGC                                    | <i>mpkB-gfp</i> plasmid            |
| 10 | nosT_hphR_vv                  | CCCAGCACTCGTCCGAGGGCAAAGGAATAGAT<br>CGATGAATTCTCATGTTTG   | <i>mpkB-gfp</i> plasmid            |
| 11 | gpda_for_vv                   | CTTGGTTGAATTTAGAACGTGG                                    | <i>mpkB-gfp</i> plasmid            |
| 12 | Hph_Rev_vv                    | TTCCTTTGCCCTCGGACGAGTGC                                   | <i>mpkB-gfp</i> plasmid            |
| 13 | mpkA_for                      | CTCATTCCTTGTCTGATGCG                                      | <i>mpkA</i> deletion               |
| 14 | mpkA_rev                      | GACTGTGCGAGAAATCCGCTTC                                    | <i>mpkA</i> deletion               |
| 15 | pksP_75_for                   | CAACCTCTTGCAGGCGAAGAAC                                    | <i>pksP</i> deletion               |
| 16 | pksP_-4_rev                   | GGAATCATGGCCGTGCCATG                                      | <i>pksP</i> deletion               |
| 17 | gpaA_for                      | CATTCGTCTCGTTCTCCGAAC                                     | <i>gpaA</i> deletion plasmid       |
| 18 | gpaA_rev                      | CTGTGCCACTGCCATATCG                                       | <i>gpaA</i> deletion plasmid       |
| 19 | gpaA_XbaI_for                 | TCTAGAGCTCCTCTTACTGTGTACTC                                | <i>gpaA</i> deletion plasmid       |
| 20 | gpaA_XbaI_rev                 | TCTAGACAGATAACCCGCTGCACATG                                | <i>gpaA</i> deletion plasmid       |
| 21 | gpaC_F_XbaI                   | CTCCTTGCTCTAGAGGACGC                                      | <i>gpaC</i> deletion plasmid       |
| 22 | gpaC_R_XbaI                   | CTGAGCTTCTAGACATGCAGAC                                    | <i>gpaC</i> deletion plasmid       |
| 23 | gprM_for                      | ATTGTCACCTCCATGTTCACTCC                                   | <i>gprM</i> deletion               |
| 24 | gprM_rev_ptrA                 | GGCCTGAGTGGCCATCGAATTCCTTGTTCGTG<br>TGACTTCTGCG           | <i>gprM</i> deletion               |
| 25 | gprM_for_ptrA                 | GAGGCCATCTAGGCCATCAAGCGCTATGTCAT<br>ACCGTTGAGGC           | <i>gprM</i> deletion               |
| 26 | gprM_rev                      | GTGATAGTGCCATGCTGATGC                                     | <i>gprM</i> deletion               |
| 27 | ptrA_for                      | GAATTCGATGGCCACTCAGGCC                                    | <i>ptrA</i> cassette amplification |
| 28 | ptrA_rev                      | GCTTGATGGCCTAGATGGCTC                                     | <i>ptrA</i> cassette amplification |
| 29 | gprMc1                        | GCTGTAATACGACTCACTATAGGGAATATTGT<br>CGGTAGTCTAGACTGTGG    | <i>gprM</i> complementation        |
| 30 | gprMc2                        | GTTTGAACGATCTGCAGCCGGGCGGCCGCTCT<br>AGTCATCATATTCCCAGATAG | <i>gprM</i> complementation        |
| 31 | gprMc3                        | CAATAGTGCCACGTTCTAAATTCAACCAAGCC<br>ACTAGATCCCCGCATTC     | <i>gprM</i> complementation        |
| 32 | gprMc4                        | CATAACTAATTACATGATGCGGCCCTCTAGGT<br>GAGTCTTCTCTAGACCAC    | <i>gprM</i> complementation        |
| 33 | NosT_f                        | CATAACTAATTACATGATGCGGCCCTCTAGGT<br>GAGTCTTCTCTAGACCAC    | <i>gprM</i> complementation        |
| 34 | pUC19 5'ORF<br>mpkA-for       | TTGTAAAACGACGGCCAGTGC GGCTACACACG<br>ACACTC               | <i>mpkA-3xHA</i> plasmid           |
| 35 | 5'ORF mpkA linker<br>3xHA-rev | TACCACCTCCTTGGACATCCATCCCCCG                              | <i>mpkA-3xHA</i> plasmid           |

Supplementary Table S1. Primers used in this study (*continued*).

| N° | Name               | Sequence 5'-3'                                                      | Usage                    |
|----|--------------------|---------------------------------------------------------------------|--------------------------|
| 36 | ptrA 3' mpkA-for   | CCCATGATAGACGTTGACTTTCGTATGAAG                                      | <i>mpkA-3xHA</i> plasmid |
| 37 | pUC19 3' mpkA-rv   | ATCCCCGGGTACCGAGCTCGGAAATCCGCTTCAACACC                              | <i>mpkA-3xHA</i> plasmid |
| 38 | linker3xHA trpC-fr | GGAGGTGGTAGCGGTGGT                                                  | <i>mpkA-3xHA</i> plasmid |
| 39 | linker3xHA trpC-rv | CTGTCAGATCTGTAAAAAAGTTTCGGCCGGC                                     | <i>mpkA-3xHA</i> plasmid |
| 40 | pYes2_ptrA_F       | GGGCGCTACAGGGCGCGTGGGGATGATCCAGGGAACAAAAGCTGGGTACC                  | GpaA-GprM co-IP          |
| 41 | pYes2_ptrA_R       | GGCCTTCCGGTTTCATACACCGGGCAAAGGGGCTGCAGGAATTCGATGG                   | GpaA-GprM co-IP          |
| 42 | pYes2_Tet_F        | CTTTGCCCGGTGTATGAAACC                                               | GpaA-GprM co-IP          |
| 43 | pYes2_Tet_R        | CCGCCAGTGTGATGGATATCTGCAGAATTCTGTGATGTGATGGAGTTGAG                  | GpaA-GprM co-IP          |
| 44 | gpaAG1             | GCTGTAATACGACTCACTATAGGGAATATTGACTTTTCGTTAAGAGACTCC                 | <i>gpaA-gfp</i> plasmid  |
| 45 | gpaAG2             | GGTGAACAGCTCCTCGCCCTTGCTCACCATGATCAGACCACAGAGTCTG                   | <i>gpaA-gfp</i> plasmid  |
| 46 | gpaAG3             | ACGAGCGTCAGCGCGAGTGTGCTGAGTAAGAGCCATTATACTTGACGGAG                  | <i>gpaA-gfp</i> plasmid  |
| 47 | gpaAG4             | CATAACTAATTACATGATGCGGCCCTCTAGGCAGGGCTGAATTCGAGATG                  | <i>gpaA-gfp</i> plasmid  |
| 48 | nosT-pyrP          | CCTGAGTGGCCATCGAATTCCTGCAGCCCCGATGAATTCATGTTTGAC                    | <i>gpaA-gfp</i> plasmid  |
| 49 | ptrA_for_2         | GGGCTGCAGGAATTCGATGG                                                | <i>gpaA-gfp</i> plasmid  |
| 50 | ptrA-rev3          | TTACTCAGCACACTCGCGCTG                                               | <i>gpaA-gfp</i> plasmid  |
| 51 | pTet_ptrA_F        | GGCCCTGCATTAATGAATCGG                                               | GpaA-GprM co-IP          |
| 52 | pTet_ptrA_R        | TGTGATGTGATGGAGTTGAGATGGA                                           | GpaA-GprM co-IP          |
| 53 | 2A_F               | GGCTCTGGCGCCACCAACTTCTCTCTCCTCAAACAGGCTGGCGACGTTGAAGAAAACCTGGCCCT   | GpaA-GprM co-IP          |
| 54 | 2A_R               | AGGGCCAGGGTTTTTCTTCAACGTCGCCAGCCTGTTTGAGGAGAGAGAAGTTGGTGGCGCCAGAGCC | GpaA-GprM co-IP          |
| 55 | Tet_gpaA_F         | CTCAACTCCATCACATCACAATGGGTGTGGAATGAGTAC                             | GpaA-GprM co-IP          |
| 56 | 2A_GFP_R           | GAAGTTGGTGGCGCCAGGCCCTTGACAGCTCGTCCATGC                             | GpaA-GprM co-IP          |
| 57 | 2A_gprM_F          | GACGTTGAAGAAAACCTGGCCCTATGACGAAATCGTACATCATT                        | GpaA-GprM co-IP          |
| 58 | pYes2_troT_R       | TGGCCGATTCATTAATGCAGGGCCGTAAAAAAGTTTCGGCCGGC                        | GpaA-GprM co-IP          |
| 59 | Tet_GFP_F          | CTCAACTCCATCACATCACAATGGTGAGCAAGGGCGAGGA                            | GpaA-GprM co-IP          |
