# Supplementary material for: Mitogen-Activated Protein Kinase Cross-Talk Interaction Modulates the Production of Melanins in Aspergillus fumigatus
Source: PubMed Central journal article supplement (PMC6437049; doi:10.1128/mbio.00215-19), 2019-03-26
Supplement: mBio.00215-19-st002.pdf [file mBio.00215-19-st002.pdf]

Supplementary Table S2. Plasmids used in this study.

| Name                                                 | Features                                                                                                               | Usage                                | Reference         |
|------------------------------------------------------|------------------------------------------------------------------------------------------------------------------------|--------------------------------------|-------------------|
| p123                                                 | Amp <sup>+</sup> , <i>otefp</i> -eGFP                                                                                  | cloning                              | (6)               |
| pCR2.1                                               | Kan <sup>+</sup> , Amp <sup>+</sup>                                                                                    | cloning                              | Invitrogen        |
| pCR2.1- <i>gpaA</i>                                  | <i>gpaA</i> plus flanking                                                                                              | <i>gpaA</i> deletion                 | This study        |
| pCR2.1- <i>gpaC</i>                                  | <i>gpaC</i> plus flanking                                                                                              | <i>gpaC</i> deletion                 | This study        |
| pCR2.1- <i>mpkB</i>                                  | <i>mpkB</i> plus flanking                                                                                              | cloning                              | This study        |
| pCR2.1- <i>mpkBc</i>                                 | <i>mpkB</i> - <i>hph</i>                                                                                               | $\Delta$ <i>mpkB</i> complementation | This study        |
| pCR2.1- <i>pksP</i>                                  | <i>pksP</i> incomplete                                                                                                 | <i>pksP</i> deletion                 | This study        |
| pCR2.1- $\Delta$ <i>pksP</i> :: <i>hph</i>           | <i>pksP</i> , <i>hph</i>                                                                                               | <i>pksP</i> deletion                 | This study        |
| pCR2.1- $\Delta$ <i>gpaA</i> :: <i>ptrA</i>          | <i>gpaA</i> flanking, <i>ptrA</i>                                                                                      | <i>gpaA</i> deletion                 | This study        |
| pCR2.1- $\Delta$ <i>gpaC</i> :: <i>ptrA</i>          | <i>gpaC</i> flanking, <i>ptrA</i>                                                                                      | <i>gpaC</i> deletion                 | This study        |
| pCR2.1- $\Delta$ <i>mpkA</i> :: <i>ptrA</i>          | <i>mpkA</i> flanking, <i>ptrA</i>                                                                                      | <i>mpkA</i> deletion                 | (7)               |
| pCR2.1- $\Delta$ <i>mpkB</i>                         | <i>mpkB</i> flanking                                                                                                   | cloning                              | This study        |
| pCR2.1- $\Delta$ <i>mpkB</i> :: <i>hph</i>           | <i>mpkB</i> flanking, <i>hph</i>                                                                                       | <i>mpkB</i> deletion                 | This study        |
| pCR2.1- $\Delta$ <i>mpkB</i> :: <i>ptrA</i>          | <i>mpkB</i> flanking, <i>ptrA</i>                                                                                      | <i>mpkB</i> deletion                 | This study        |
| pSK275                                               | Amp <sup>+</sup> , <i>ptrA</i> cassette                                                                                | cloning                              | (8)               |
| pUC- <i>hph</i>                                      | Amp <sup>+</sup> , <i>hph</i> cassette                                                                                 | cloning                              | (9)               |
| pUC- <i>hph</i> - <i>gpaA</i>                        | Amp <sup>+</sup> , <i>hph</i> cassette                                                                                 | cloning                              | This study        |
| pUC- <i>hph</i> - <i>gpaC</i>                        | Amp <sup>+</sup> , <i>hph</i> cassette                                                                                 | cloning                              | This study        |
| pYes2                                                | Amp <sup>+</sup> , <i>ura3</i>                                                                                         | cloning                              | Life Technologies |
| pYes2- <i>gprMc</i>                                  | <i>gprM</i> - <i>hph</i>                                                                                               | $\Delta$ <i>gprM</i> complementation | This study        |
| pYes2- <i>mpkB</i> - <i>gfp</i>                      | <i>mpkB</i> flanking, <i>mpkB</i> - <i>gfp</i>                                                                         | <i>mpkB</i> - <i>gfp</i> -tagging    | This study        |
| pYes2-KM- <i>ptrA</i>                                | <i>KanMX</i> - <i>ptrA</i> cassette                                                                                    | cloning                              | (10)              |
| prs426sdA::3xHA                                      | 3xHA cassette                                                                                                          | 3xHA-tagging                         | (11)              |
| pPTRI                                                | Amp <sup>+</sup>                                                                                                       | cloning                              | Clontech          |
| pUC19 <i>mpkA</i> ::3xHA                             | <i>mpkA</i> flanks, <i>mpkA</i> -3xHA                                                                                  | <i>mpkA</i> -3xHA-tagging            | This study        |
| pYes2:: <i>gpaA</i> - <i>gfp</i>                     | Gfp tagged <i>gpaA</i>                                                                                                 | GpaA-GprM co-IP                      | This study        |
| pTet:: <i>gpaA</i> - <i>gfp</i> :: <i>gprM</i> -3xHA | pYes2 with Tet <sup>on</sup> and <i>ptrA</i> , <i>gpaA</i> - <i>gfp</i> and <i>gprM</i> -3xHA separated by 2A sequence | GpaA-GprM co-IP                      | This study        |
| pTet:: <i>gfp</i> :: <i>gprM</i> -3xHA               | pYes2 with Tet <sup>on</sup> and <i>ptrA</i> , <i>gfp</i> and <i>gprM</i> -3xHA separated by 2A sequence               | GFP-GprM co-IP                       | This study        |
